# Supplementary material for: Impact of Femoral Medullary Canal Preservation During Primary Total Knee Arthroplasty on Early Perioperative Outcomes
Source: Research Square preprint supplement (doi:10.21203/rs.3.rs-8575044/v1), 2026-02-09
Supplement: Supplementary file 1 [file b95818a62413aa31aca1055a.docx]

**Supplementary Table S1. Multivariable Linear Regression Analysis Predicting Hemoglobin Drop**

| **Variable** | **Coefficient (β)** | **95% CI** | **p-value** | **Interpretation** |
| --- | --- | --- | --- | --- |
| Intercept | 3.21 | 2.10 to 4.32 | <0.001* | Baseline Hb drop when all predictors = 0 |
| EM referencing | −0.42 | −0.71 to −0.13 | 0.005* | EM associated with 0.42 g/dL less Hb drop |
| Age (years) | 0.01 | −0.02 to 0.04 | 0.52 | No significant age effect |
| Sex (F vs M) | 0.08 | −0.21 to 0.37 | 0.59 | No significant gender effect |
| BMI (kg/m²) | −0.02 | −0.06 to 0.02 | 0.32 | No significant BMI effect |
| Admission Hb (g/dL) | −0.10 | −0.25 to 0.05 | 0.19 | Trend toward lower drop with higher baseline Hb |
| Log (D-dimer) | 0.18 | 0.02 to 0.34 | 0.03* | Higher D-dimer associated with greater Hb drop |
| Ischemic time (min) | 0.01 | −0.01 to 0.03 | 0.28 | No significant effect |

Multivariable linear regression model adjusting for femoral referencing technique (extramedullary vs. intramedullary), age, sex, body mass index (BMI), admission hemoglobin level, log‑transformed D‑dimer level, and ischemic time. Regression coefficients (β) represent the estimated change in postoperative hemoglobin drop (g/dL) per unit increase in each predictor, holding all other variables constant. Statistical significance was defined as p < 0.05 and is indicated by an asterisk. Model performance is summarized by R² and adjusted R² values (R² = 0.31; adjusted R² = 0.26; overall model F‑test p < 0.001).

**Supplementary Table S2. Multivariable Linear Regression Analysis Predicting Estimated Blood Loss**

| **Variable** | **Coefficient (β)** | **95% CI** | **p-value** | **Interpretation** |
| --- | --- | --- | --- | --- |
| Intercept | 890.2 | 720.4 to 1060.0 | <0.001* | Baseline EBL when all predictors = 0 |
| EM referencing | −132.6 | −225.4 to −39.8 | 0.006* | EM associated with 132.6 mL less blood loss |
| Age (years) | 1.8 | −1.2 to 4.8 | 0.23 | No significant age effect |
| Sex (F vs M) | 18.4 | −52.6 to 89.4 | 0.61 | No significant gender effect |
| BMI (kg/m²) | −2.1 | −8.4 to 4.2 | 0.51 | No significant BMI effect |
| Admission Hb (g/dL) | −12.3 | −28.6 to 4.0 | 0.14 | Trend toward lower EBL with higher baseline Hb |
| Log (D-dimer) | 45.7 | 5.2 to 86.2 | 0.028* | Higher D-dimer associated with greater EBL |
| Ischemic time (min) | 2.6 | −0.8 to 6.0 | 0.13 | No significant effect |

Multivariable linear regression model adjusting for femoral referencing technique (extramedullary vs. intramedullary), age, sex, body mass index (BMI), admission hemoglobin level, log‑transformed D‑dimer level, and ischemic time. Regression coefficients (β) represent the estimated change in estimated blood loss (mL) per unit increase in each predictor, holding all other variables constant. Statistical significance was defined as p < 0.05 and is indicated by an asterisk. Model performance is summarized by R² and adjusted R² values (R² = 0.18; adjusted R² = 0.12; overall model F‑test p = 0.007).
